# Supplementary material for: Waste Polyurethane Foams as Biomass Carriers in the Treatment Process of Domestic Sewage with Increased Ammonium Nitrogen Content
Source: MDPI journal article supplement (doi:10.3390/ma16020619), 2023-01-09
Supplement: s1 [file s1]

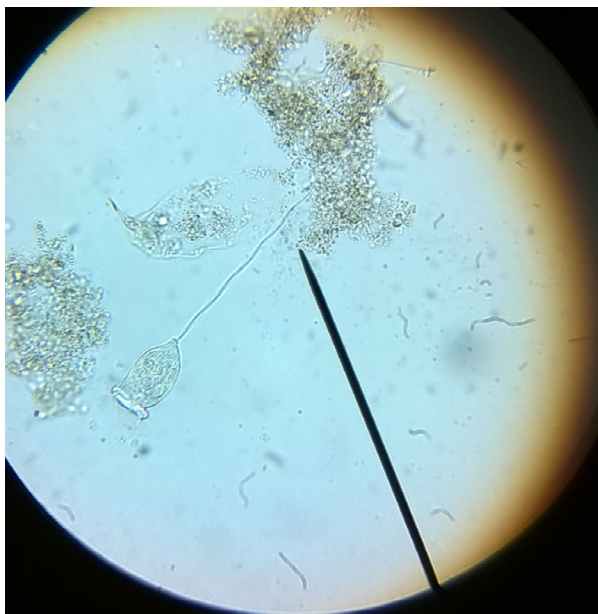

(a) Bluish-green foam, column A

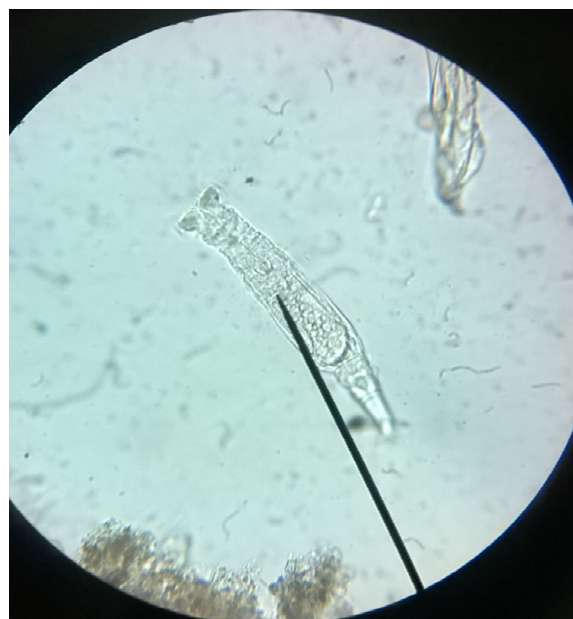

(b) Bluish-green foam, column B

**Figure S1.** Photo of (a) *Vorticella* sp.; (b) *Philodina* sp. (phot. E. Dacewicz).
